# Supplementary material for: General practitioners' perceptions of the effectiveness of medical interventions: an exploration of underlying constructs
Source: Springer Nature journal article supplement (doi:10.1186/1748-5908-5-17), 2010-02-16
Supplement: Additional file 1 [file 1748-5908-5-17-s1.pdf]

# GP' attitudes towards the effectiveness of medical interventions

Please rate 8 medical interventions using the 11 differences mentioned most often in the interviews. In the layout you are asked to rate each medical intervention - one at a time. The layout is quick and easy to complete. Tick one box per row.

## EXAMPLE:

Using statins to prevent heart disease. Please tick one box in each row.

|                                                                 | 1 | 2 | 3 | 4 | 5 | 6 | 7 |                                                                            |
|-----------------------------------------------------------------|---|---|---|---|---|---|---|----------------------------------------------------------------------------|
| this intervention has <b>robust evidence of effectiveness</b>   | x |   |   |   |   |   |   | this intervention has <b>weak and/or minimal evidence of effectiveness</b> |
| this intervention has a <b>large treatment effect for users</b> |   |   |   |   |   | x |   | this intervention has a <b>small treatment effect for users</b>            |

If you **totally agree** that there is "**robust evidence**" for statins to prevent heart disease, just make a tick at 1.

If you **somewhat agree** that there is a "**small treatment effect for users**" from statins to prevent heart disease, just make a tick at 6.

**1. Using statins to prevent heart disease.** Please tick one box in each row.

|                                                                                         | 1 | 2 | 3 | 4 | 5 | 6 | 7 |                                                                            |
|-----------------------------------------------------------------------------------------|---|---|---|---|---|---|---|----------------------------------------------------------------------------|
| this intervention has <b>robust evidence of effectiveness</b>                           |   |   |   |   |   |   |   | this intervention has <b>weak and/or minimal evidence of effectiveness</b> |
| this intervention has a <b>large treatment effect for users</b>                         |   |   |   |   |   |   |   | this intervention has a <b>small treatment effect for users</b>            |
| <b>a large proportion of users will benefit</b> from this intervention                  |   |   |   |   |   |   |   | <b>a small proportion of users will benefit</b> from this intervention     |
| <b>success requires a lot of motivation</b> from the patient                            |   |   |   |   |   |   |   | <b>success requires little motivation</b> from the patient                 |
| this is a <b>biomedical intervention</b> (treatment using drugs, radiation, or surgery) |   |   |   |   |   |   |   | this is <b>not a biomedical intervention</b>                               |
| this intervention is <b>appealing to patients</b>                                       |   |   |   |   |   |   |   | this intervention is <b>not appealing to patients</b>                      |
| the impact of this intervention <b>can be precisely measured</b>                        |   |   |   |   |   |   |   | the impact of this intervention is <b>difficult to measure</b>             |
| this is a <b>lifestyle intervention</b> (e.g. diet and exercise education)              |   |   |   |   |   |   |   | this is <b>not a lifestyle intervention</b>                                |
| this intervention is <b>cost-effective</b>                                              |   |   |   |   |   |   |   | this intervention is <b>not cost-effective</b>                             |
| this is a <b>patient led intervention</b>                                               |   |   |   |   |   |   |   | this is a <b>health-care-professional led intervention</b>                 |
| this intervention brings <b>long-term benefits</b>                                      |   |   |   |   |   |   |   | this intervention only <b>helps in the short-term</b>                      |
|                                                                                         | 1 | 2 | 3 | 4 | 5 | 6 | 7 |                                                                            |

**2. Using Diclofenac 50mg to reduce acute pain.** Please tick one box in each row.

|                                                                                         | 1 | 2 | 3 | 4 | 5 | 6 | 7 |                                                                            |
|-----------------------------------------------------------------------------------------|---|---|---|---|---|---|---|----------------------------------------------------------------------------|
| this intervention has <b>robust evidence of effectiveness</b>                           |   |   |   |   |   |   |   | this intervention has <b>weak and/or minimal evidence of effectiveness</b> |
| this intervention has a <b>large treatment effect for users</b>                         |   |   |   |   |   |   |   | this intervention has a <b>small treatment effect for users</b>            |
| <b>a large proportion of users will benefit</b> from this intervention                  |   |   |   |   |   |   |   | <b>a small proportion of users will benefit</b> from this intervention     |
| <b>success requires a lot of motivation</b> from the patient                            |   |   |   |   |   |   |   | <b>success requires little motivation</b> from the patient                 |
| this is a <b>biomedical intervention</b> (treatment using drugs, radiation, or surgery) |   |   |   |   |   |   |   | this is <b>not a biomedical intervention</b>                               |
| this intervention is <b>appealing to patients</b>                                       |   |   |   |   |   |   |   | this intervention is <b>not appealing to patients</b>                      |
| the impact of this intervention <b>can be precisely measured</b>                        |   |   |   |   |   |   |   | the impact of this intervention is <b>difficult to measure</b>             |
| this is a <b>lifestyle intervention</b> (e.g. diet and exercise education)              |   |   |   |   |   |   |   | this is <b>not a lifestyle intervention</b>                                |
| this intervention is <b>cost-effective</b>                                              |   |   |   |   |   |   |   | this intervention is <b>not cost-effective</b>                             |
| this is a <b>patient led intervention</b>                                               |   |   |   |   |   |   |   | this is a <b>health-care-professional led intervention</b>                 |
| this intervention brings <b>long-term benefits</b>                                      |   |   |   |   |   |   |   | this intervention only <b>helps in the short-term</b>                      |
|                                                                                         | 1 | 2 | 3 | 4 | 5 | 6 | 7 |                                                                            |

**3. Using cognitive behaviour therapy to treat depression.** Please tick one box in each row.

|                                                                                         | 1 | 2 | 3 | 4 | 5 | 6 | 7 |                                                                            |
|-----------------------------------------------------------------------------------------|---|---|---|---|---|---|---|----------------------------------------------------------------------------|
| this intervention has <b>robust evidence of effectiveness</b>                           |   |   |   |   |   |   |   | this intervention has <b>weak and/or minimal evidence of effectiveness</b> |
| this intervention has a <b>large treatment effect for users</b>                         |   |   |   |   |   |   |   | this intervention has a <b>small treatment effect for users</b>            |
| <b>a large proportion of users will benefit</b> from this intervention                  |   |   |   |   |   |   |   | <b>a small proportion of users will benefit</b> from this intervention     |
| <b>success requires a lot of motivation</b> from the patient                            |   |   |   |   |   |   |   | <b>success requires little motivation</b> from the patient                 |
| this is a <b>biomedical intervention</b> (treatment using drugs, radiation, or surgery) |   |   |   |   |   |   |   | this is <b>not a biomedical intervention</b>                               |
| this intervention is <b>appealing to patients</b>                                       |   |   |   |   |   |   |   | this intervention is <b>not appealing to patients</b>                      |
| the impact of this intervention <b>can be precisely measured</b>                        |   |   |   |   |   |   |   | the impact of this intervention is <b>difficult to measure</b>             |
| this is a <b>lifestyle intervention</b> (e.g. diet and exercise education)              |   |   |   |   |   |   |   | this is <b>not a lifestyle intervention</b>                                |
| this intervention is <b>cost-effective</b>                                              |   |   |   |   |   |   |   | this intervention is <b>not cost-effective</b>                             |
| this is a <b>patient led intervention</b>                                               |   |   |   |   |   |   |   | this is a <b>health-care-professional led intervention</b>                 |
| this intervention brings <b>long-term benefits</b>                                      |   |   |   |   |   |   |   | this intervention only <b>helps in the short-term</b>                      |
|                                                                                         | 1 | 2 | 3 | 4 | 5 | 6 | 7 |                                                                            |

**4. Using stop smoking groups to stop smoking.** Please tick one box in each row.

|                                                                                         | 1 | 2 | 3 | 4 | 5 | 6 | 7 |                                                                            |
|-----------------------------------------------------------------------------------------|---|---|---|---|---|---|---|----------------------------------------------------------------------------|
| this intervention has <b>robust evidence of effectiveness</b>                           |   |   |   |   |   |   |   | this intervention has <b>weak and/or minimal evidence of effectiveness</b> |
| this intervention has a <b>large treatment effect for users</b>                         |   |   |   |   |   |   |   | this intervention has a <b>small treatment effect for users</b>            |
| <b>a large proportion of users will benefit</b> from this intervention                  |   |   |   |   |   |   |   | <b>a small proportion of users will benefit</b> from this intervention     |
| <b>success requires a lot of motivation</b> from the patient                            |   |   |   |   |   |   |   | <b>success requires little motivation</b> from the patient                 |
| this is a <b>biomedical intervention</b> (treatment using drugs, radiation, or surgery) |   |   |   |   |   |   |   | this is <b>not a biomedical intervention</b>                               |
| this intervention is <b>appealing to patients</b>                                       |   |   |   |   |   |   |   | this intervention is <b>not appealing to patients</b>                      |
| the impact of this intervention <b>can be precisely measured</b>                        |   |   |   |   |   |   |   | the impact of this intervention is <b>difficult to measure</b>             |
| this is a <b>lifestyle intervention</b> (e.g. diet and exercise education)              |   |   |   |   |   |   |   | this is <b>not a lifestyle intervention</b>                                |
| this intervention is <b>cost-effective</b>                                              |   |   |   |   |   |   |   | this intervention is <b>not cost-effective</b>                             |
| this is a <b>patient led intervention</b>                                               |   |   |   |   |   |   |   | this is a <b>health-care-professional led intervention</b>                 |
| this intervention brings <b>long-term benefits</b>                                      |   |   |   |   |   |   |   | this intervention only <b>helps in the short-term</b>                      |
|                                                                                         | 1 | 2 | 3 | 4 | 5 | 6 | 7 |                                                                            |

**5. Using stomach surgery to achieve weight loss in obese adults.** Please tick one box in each row.

|                                                                                         | 1 | 2 | 3 | 4 | 5 | 6 | 7 |                                                                            |
|-----------------------------------------------------------------------------------------|---|---|---|---|---|---|---|----------------------------------------------------------------------------|
| this intervention has <b>robust evidence of effectiveness</b>                           |   |   |   |   |   |   |   | this intervention has <b>weak and/or minimal evidence of effectiveness</b> |
| this intervention has a <b>large treatment effect for users</b>                         |   |   |   |   |   |   |   | this intervention has a <b>small treatment effect for users</b>            |
| <b>a large proportion of users will benefit</b> from this intervention                  |   |   |   |   |   |   |   | <b>a small proportion of users will benefit</b> from this intervention     |
| <b>success requires a lot of motivation</b> from the patient                            |   |   |   |   |   |   |   | <b>success requires little motivation</b> from the patient                 |
| this is a <b>biomedical intervention</b> (treatment using drugs, radiation, or surgery) |   |   |   |   |   |   |   | this is <b>not a biomedical intervention</b>                               |
| this intervention is <b>appealing to patients</b>                                       |   |   |   |   |   |   |   | this intervention is <b>not appealing to patients</b>                      |
| the impact of this intervention <b>can be precisely measured</b>                        |   |   |   |   |   |   |   | the impact of this intervention is <b>difficult to measure</b>             |
| this is a <b>lifestyle intervention</b> (e.g. diet and exercise education)              |   |   |   |   |   |   |   | this is <b>not a lifestyle intervention</b>                                |
| this intervention is <b>cost-effective</b>                                              |   |   |   |   |   |   |   | this intervention is <b>not cost-effective</b>                             |
| this is a <b>patient led intervention</b>                                               |   |   |   |   |   |   |   | this is a <b>health-care-professional led intervention</b>                 |
| this intervention brings <b>long-term benefits</b>                                      |   |   |   |   |   |   |   | this intervention only <b>helps in the short-term</b>                      |
|                                                                                         | 1 | 2 | 3 | 4 | 5 | 6 | 7 |                                                                            |

**6. Stopping smoking to prevent heart disease.** Please tick one box in each row.

|                                                                                         | 1 | 2 | 3 | 4 | 5 | 6 | 7 |                                                                            |
|-----------------------------------------------------------------------------------------|---|---|---|---|---|---|---|----------------------------------------------------------------------------|
| this intervention has <b>robust evidence of effectiveness</b>                           |   |   |   |   |   |   |   | this intervention has <b>weak and/or minimal evidence of effectiveness</b> |
| this intervention has a <b>large treatment effect for users</b>                         |   |   |   |   |   |   |   | this intervention has a <b>small treatment effect for users</b>            |
| <b>a large proportion of users will benefit</b> from this intervention                  |   |   |   |   |   |   |   | <b>a small proportion of users will benefit</b> from this intervention     |
| <b>success requires a lot of motivation</b> from the patient                            |   |   |   |   |   |   |   | <b>success requires little motivation</b> from the patient                 |
| this is a <b>biomedical intervention</b> (treatment using drugs, radiation, or surgery) |   |   |   |   |   |   |   | this is <b>not a biomedical intervention</b>                               |
| this intervention is <b>appealing to patients</b>                                       |   |   |   |   |   |   |   | this intervention is <b>not appealing to patients</b>                      |
| the impact of this intervention <b>can be precisely measured</b>                        |   |   |   |   |   |   |   | the impact of this intervention is <b>difficult to measure</b>             |
| this is a <b>lifestyle intervention</b> (e.g. diet and exercise education)              |   |   |   |   |   |   |   | this is <b>not a lifestyle intervention</b>                                |
| this intervention is <b>cost-effective</b>                                              |   |   |   |   |   |   |   | this intervention is <b>not cost-effective</b>                             |
| this is a <b>patient led intervention</b>                                               |   |   |   |   |   |   |   | this is a <b>health-care-professional led intervention</b>                 |
| this intervention brings <b>long-term benefits</b>                                      |   |   |   |   |   |   |   | this intervention only <b>helps in the short-term</b>                      |
|                                                                                         | 1 | 2 | 3 | 4 | 5 | 6 | 7 |                                                                            |

**7. Using a lifestyle education program (diet and exercise) to prevent type 2 diabetes.** Please tick one box in each row.

|                                                                                         | 1 | 2 | 3 | 4 | 5 | 6 | 7 |                                                                            |
|-----------------------------------------------------------------------------------------|---|---|---|---|---|---|---|----------------------------------------------------------------------------|
| this intervention has <b>robust evidence of effectiveness</b>                           |   |   |   |   |   |   |   | this intervention has <b>weak and/or minimal evidence of effectiveness</b> |
| this intervention has a <b>large treatment effect for users</b>                         |   |   |   |   |   |   |   | this intervention has a <b>small treatment effect for users</b>            |
| <b>a large proportion of users will benefit</b> from this intervention                  |   |   |   |   |   |   |   | <b>a small proportion of users will benefit</b> from this intervention     |
| <b>success requires a lot of motivation</b> from the patient                            |   |   |   |   |   |   |   | <b>success requires little motivation</b> from the patient                 |
| this is a <b>biomedical intervention</b> (treatment using drugs, radiation, or surgery) |   |   |   |   |   |   |   | this is <b>not a biomedical intervention</b>                               |
| this intervention is <b>appealing to patients</b>                                       |   |   |   |   |   |   |   | this intervention is <b>not appealing to patients</b>                      |
| the impact of this intervention <b>can be precisely measured</b>                        |   |   |   |   |   |   |   | the impact of this intervention is <b>difficult to measure</b>             |
| this is a <b>lifestyle intervention</b> (e.g. diet and exercise education)              |   |   |   |   |   |   |   | this is <b>not a lifestyle intervention</b>                                |
| this intervention is <b>cost-effective</b>                                              |   |   |   |   |   |   |   | this intervention is <b>not cost-effective</b>                             |
| this is a <b>patient led intervention</b>                                               |   |   |   |   |   |   |   | this is a <b>health-care-professional led intervention</b>                 |
| this intervention brings <b>long-term benefits</b>                                      |   |   |   |   |   |   |   | this intervention only <b>helps in the short-term</b>                      |
|                                                                                         | 1 | 2 | 3 | 4 | 5 | 6 | 7 |                                                                            |

**8. Using nicotine replacement patches/gum to stop smoking.** Please tick one box in each row.

|                                                                                         | 1 | 2 | 3 | 4 | 5 | 6 | 7 |                                                                            |
|-----------------------------------------------------------------------------------------|---|---|---|---|---|---|---|----------------------------------------------------------------------------|
| this intervention has <b>robust evidence of effectiveness</b>                           |   |   |   |   |   |   |   | this intervention has <b>weak and/or minimal evidence of effectiveness</b> |
| this intervention has a <b>large treatment effect for users</b>                         |   |   |   |   |   |   |   | this intervention has a <b>small treatment effect for users</b>            |
| <b>a large proportion of users will benefit</b> from this intervention                  |   |   |   |   |   |   |   | <b>a small proportion of users will benefit</b> from this intervention     |
| <b>success requires a lot of motivation</b> from the patient                            |   |   |   |   |   |   |   | <b>success requires little motivation</b> from the patient                 |
| this is a <b>biomedical intervention</b> (treatment using drugs, radiation, or surgery) |   |   |   |   |   |   |   | this is <b>not a biomedical intervention</b>                               |
| this intervention is <b>appealing to patients</b>                                       |   |   |   |   |   |   |   | this intervention is <b>not appealing to patients</b>                      |
| the impact of this intervention <b>can be precisely measured</b>                        |   |   |   |   |   |   |   | the impact of this intervention is <b>difficult to measure</b>             |
| this is a <b>lifestyle intervention</b> (e.g. diet and exercise education)              |   |   |   |   |   |   |   | this is <b>not a lifestyle intervention</b>                                |
| this intervention is <b>cost-effective</b>                                              |   |   |   |   |   |   |   | this intervention is <b>not cost-effective</b>                             |
| this is a <b>patient led intervention</b>                                               |   |   |   |   |   |   |   | this is a <b>health-care-professional led intervention</b>                 |
| this intervention brings <b>long-term benefits</b>                                      |   |   |   |   |   |   |   | this intervention only <b>helps in the short-term</b>                      |
|                                                                                         | 1 | 2 | 3 | 4 | 5 | 6 | 7 |                                                                            |
